# Supplementary material for: Interaction of collagen like peptides with gold nanosurfaces: a molecular dynamics investigation
Source: Royal Society of Chemistry journal article supplement (doi:10.1039/c4cp04969a), 2015-01-01
Supplement: c4cp04969a1.pdf [file c4cp04969a1.pdf]

## Supporting information

**Table S1. MODEL-1 (GPO\_AuNS) Conventional Hydrogen Bonds**

| <b>Donor Residue</b> | <b>Donor Residue No</b> | <b>Donor Atom</b> | <b>Acceptor Residue</b> | <b>Acceptor Residue No</b> | <b>Acceptor Atom</b> | <b>Occupancy%</b> |
|----------------------|-------------------------|-------------------|-------------------------|----------------------------|----------------------|-------------------|
| GLY                  | 7                       | N                 | PRO                     | 5                          | O                    | 89.60             |
| GLY                  | 7                       | N                 | PRO                     | 8                          | O                    | 70.58             |
| GLY                  | 10                      | N                 | PRO                     | 8                          | O                    | 86.68             |
| GLY                  | 10                      | N                 | PRO                     | 8                          | O                    | 85.27             |
| GLY                  | 10                      | N                 | PRO                     | 11                         | O                    | 80.60             |
| GLY                  | 13                      | N                 | PRO                     | 11                         | O                    | 81.33             |
| GLY                  | 16                      | N                 | PRO                     | 14                         | O                    | 87.30             |
| GLY                  | 16                      | N                 | PRO                     | 17                         | O                    | 79.17             |
| GLY                  | 16                      | N                 | PRO                     | 14                         | O                    | 77.56             |
| GLY                  | 19                      | N                 | PRO                     | 20                         | O                    | 73.64             |
| GLY                  | 19                      | N                 | PRO                     | 17                         | O                    | 62.94             |
| GLY                  | 22                      | N                 | PRO                     | 20                         | O                    | 75.99             |
| GLY                  | 22                      | N                 | PRO                     | 23                         | O                    | 72.58             |
| GLY                  | 25                      | N                 | PRO                     | 23                         | O                    | 53.32             |
| GLY                  | 25                      | N                 | PRO                     | 23                         | O                    | 51.04             |

**Table S2. MODEL-2 (GPP\_AuNS) Conventional Hydrogen Bonds**

| <b>Donor Residue</b> | <b>Donor Residue NO</b> | <b>Donor Atom</b> | <b>Acceptor Residue</b> | <b>Acceptor Residue NO</b> | <b>Acceptor Atom</b> | <b>Occupancy%</b> |
|----------------------|-------------------------|-------------------|-------------------------|----------------------------|----------------------|-------------------|
| GLY                  | 4                       | N                 | PRO                     | 2                          | O                    | 31.81             |
| GLY                  | 4                       | N                 | PRO                     | 2                          | O                    | 62.48             |
| GLY                  | 4                       | N                 | PRO                     | 5                          | O                    | 71.61             |
| GLY                  | 7                       | N                 | PRO                     | 5                          | O                    | 93.15             |
| GLY                  | 7                       | N                 | PRO                     | 5                          | O                    | 94.58             |
| GLY                  | 7                       | N                 | PRO                     | 8                          | O                    | 70.32             |
| GLY                  | 10                      | N                 | PRO                     | 8                          | O                    | 78.82             |
| GLY                  | 10                      | N                 | PRO                     | 8                          | O                    | 92.89             |
| GLY                  | 10                      | N                 | PRO                     | 11                         | O                    | 95.37             |
| GLY                  | 13                      | N                 | PRO                     | 11                         | O                    | 78.17             |
| GLY                  | 13                      | N                 | PRO                     | 11                         | O                    | 88.61             |
| GLY                  | 13                      | N                 | PRO                     | 14                         | O                    | 94.39             |
| GLY                  | 16                      | N                 | PRO                     | 14                         | O                    | 91.45             |
| GLY                  | 16                      | N                 | PRO                     | 14                         | O                    | 92.95             |
| GLY                  | 16                      | N                 | PRO                     | 17                         | O                    | 92.73             |
| GLY                  | 19                      | N                 | PRO                     | 17                         | O                    | 89.57             |
| GLY                  | 19                      | N                 | PRO                     | 17                         | O                    | 90.49             |
| GLY                  | 19                      | N                 | PRO                     | 20                         | O                    | 90.93             |
| GLY                  | 22                      | N                 | PRO                     | 20                         | O                    | 92.18             |
| GLY                  | 22                      | N                 | PRO                     | 20                         | O                    | 92.50             |
| GLY                  | 22                      | N                 | PRO                     | 23                         | O                    | 92.28             |
| GLY                  | 25                      | N                 | PRO                     | 23                         | O                    | 92.11             |
| GLY                  | 25                      | N                 | PRO                     | 23                         | O                    | 92.78             |

**Table S3. MODEL-3 (TYPEIII\_AuNS) Conventional Hydrogen Bonds**

| <b>Donor Residue</b> | <b>Donor Residue NO</b> | <b>Donor Atom</b> | <b>Acceptor Residue</b> | <b>Acceptor Residue NO</b> | <b>Acceptor Atom</b> | <b>Occupancy%</b> |
|----------------------|-------------------------|-------------------|-------------------------|----------------------------|----------------------|-------------------|
| GLY                  | 1                       | N                 | GLY                     | 1                          | O                    | 38.71             |
| GLY                  | 4                       | N                 | PRO                     | 2                          | O                    | 90.75             |
| GLY                  | 4                       | N                 | ARG                     | 3                          | O                    | 56.59             |
| GLY                  | 4                       | N                 | ASP                     | 5                          | O                    | 59.23             |
| GLY                  | 7                       | N                 | ASP                     | 5                          | O                    | 54.93             |
| GLY                  | 7                       | N                 | ASP                     | 5                          | O                    | 47.84             |
| GLY                  | 7                       | N                 | LYS                     | 6                          | O                    | 71.62             |
| GLY                  | 10                      | N                 | GLU                     | 8                          | O                    | 98.66             |
| GLY                  | 10                      | N                 | GLU                     | 8                          | O                    | 86.77             |
| GLY                  | 7                       | N                 | GLU                     | 8                          | O                    | 84.30             |
| GLY                  | 13                      | N                 | GLU                     | 11                         | O                    | 93.72             |
| GLY                  | 10                      | N                 | GLU                     | 11                         | O                    | 83.95             |
| GLY                  | 13                      | N                 | GLU                     | 11                         | O                    | 94.14             |
| GLY                  | 13                      | N                 | ALA                     | 14                         | O                    | 86.88             |
| GLY                  | 16                      | N                 | ALA                     | 14                         | O                    | 80.39             |
| GLY                  | 16                      | N                 | ALA                     | 14                         | O                    | 83.98             |
| GLY                  | 19                      | N                 | ILE                     | 17                         | O                    | 95.52             |
| GLY                  | 19                      | N                 | ILE                     | 17                         | O                    | 90.23             |
| GLY                  | 16                      | N                 | ILE                     | 17                         | O                    | 97.54             |
| GLY                  | 22                      | N                 | HIE                     | 20                         | O                    | 97.81             |
| GLY                  | 19                      | N                 | HIE                     | 20                         | O                    | 73.07             |
| GLY                  | 22                      | N                 | HIE                     | 20                         | O                    | 97.52             |
| GLY                  | 22                      | N                 | PHE                     | 23                         | O                    | 94.97             |
| GLY                  | 25                      | N                 | PHE                     | 23                         | O                    | 79.09             |
| GLY                  | 25                      | N                 | PHE                     | 23                         | O                    | 87.49             |
| GLY                  | 25                      | N                 | PRO                     | 26                         | O                    | 38.71             |

**Table S4. MODEL-4 (TYPE1\_AuNS) Conventional Hydrogen Bonds**

| <b>Donor Residue</b> | <b>Donor Residue NO</b> | <b>Donor Atom</b> | <b>Acceptor Residue</b> | <b>Acceptor Residue NO</b> | <b>Acceptor Atom</b> | <b>Occupancy%</b> |
|----------------------|-------------------------|-------------------|-------------------------|----------------------------|----------------------|-------------------|
| GLY                  | 757                     | N                 | SER                     | 758                        | O                    | 93.77             |
| GLY                  | 757                     | N                 | GLU                     | 755                        | O                    | 65.76             |
| GLY                  | 760                     | N                 | ALA                     | 761                        | O                    | 94.51             |
| GLY                  | 760                     | N                 | PRO                     | 758                        | O                    | 86.44             |
| GLY                  | 760                     | N                 | SER                     | 758                        | O                    | 81.96             |
| GLY                  | 763                     | N                 | ALA                     | 761                        | O                    | 97.40             |
| GLY                  | 763                     | N                 | PRO                     | 764                        | O                    | 95.94             |
| GLY                  | 763                     | N                 | GLU                     | 761                        | O                    | 87.50             |
| GLY                  | 766                     | N                 | PRO                     | 764                        | O                    | 92.62             |
| GLY                  | 769                     | N                 | THR                     | 770                        | O                    | 85.68             |
| GLY                  | 769                     | N                 | ALA                     | 767                        | O                    | 80.43             |
| GLY                  | 769                     | N                 | PRO                     | 767                        | O                    | 51.99             |
| GLY                  | 772                     | N                 | THR                     | 770                        | O                    | 92.11             |
| GLY                  | 772                     | N                 | THR                     | 770                        | O                    | 82.29             |
| GLY                  | 772                     | N                 | PRO                     | 773                        | O                    | 76.04             |
| GLY                  | 775                     | N                 | ILE                     | 776                        | O                    | 95.58             |
| GLY                  | 775                     | N                 | PRO                     | 773                        | O                    | 95.05             |
| GLY                  | 775                     | N                 | PRO                     | 773                        | O                    | 92.06             |
| GLY                  | 778                     | N                 | GLN                     | 779                        | O                    | 93.61             |
| GLY                  | 778                     | N                 | LEU                     | 776                        | O                    | 71.79             |
| GLY                  | 778                     | N                 | ILE                     | 776                        | O                    | 53.80             |

**Table S5. MODEL-1 (GPO) without\_AuNS Conventional Hydrogen Bonds**

| <b>Donor Residue</b> | <b>Donor Residue NO</b> | <b>Donor Atom</b> | <b>Acceptor Residue</b> | <b>Acceptor Residue NO</b> | <b>Acceptor Atom</b> | <b>Occupancy%</b> |
|----------------------|-------------------------|-------------------|-------------------------|----------------------------|----------------------|-------------------|
| GLY                  | 1                       | N                 | PRO                     | 2                          | O                    | 52.97             |
| GLY                  | 4                       | N                 | PRO                     | 5                          | O                    | 87.14             |
| GLY                  | 4                       | N                 | PRO                     | 2                          | O                    | 85.76             |
| GLY                  | 4                       | N                 | PRO                     | 2                          | O                    | 83.61             |
| GLY                  | 7                       | N                 | PRO                     | 5                          | O                    | 89.19             |
| GLY                  | 7                       | N                 | PRO                     | 5                          | O                    | 88.88             |
| GLY                  | 7                       | N                 | PRO                     | 8                          | O                    | 88.46             |
| GLY                  | 10                      | N                 | PRO                     | 11                         | O                    | 88.89             |
| GLY                  | 10                      | N                 | PRO                     | 8                          | O                    | 88.67             |
| GLY                  | 10                      | N                 | PRO                     | 8                          | O                    | 88.03             |
| GLY                  | 13                      | N                 | PRO                     | 14                         | O                    | 89.06             |
| ALA                  | 13                      | N                 | PRO                     | 11                         | O                    | 88.17             |
| GLY                  | 13                      | N                 | PRO                     | 11                         | O                    | 87.65             |
| GLY                  | 16                      | N                 | PRO                     | 14                         | O                    | 89.21             |
| GLY                  | 16                      | N                 | PRO                     | 14                         | O                    | 88.40             |
| GLY                  | 16                      | N                 | PRO                     | 17                         | O                    | 88.01             |
| GLY                  | 19                      | N                 | PRO                     | 17                         | O                    | 89.38             |
| GLY                  | 19                      | N                 | PRO                     | 17                         | O                    | 89.29             |
| GLY                  | 19                      | N                 | PRO                     | 20                         | O                    | 88.83             |
| GLY                  | 22                      | N                 | PRO                     | 23                         | O                    | 89.78             |
| GLY                  | 22                      | N                 | PRO                     | 20                         | O                    | 88.92             |
| GLY                  | 22                      | N                 | PRO                     | 20                         | O                    | 86.23             |
| GLY                  | 25                      | N                 | PRO                     | 23                         | O                    | 89.16             |
| GLY                  | 25                      | N                 | PRO                     | 23                         | O                    | 87.53             |

**Table S6. MODEL-2 (GPP) without\_ AuNS Conventional Hydrogen Bonds**

| <b>Donor Residue</b> | <b>Donor Residue NO</b> | <b>Donor Atom</b> | <b>Acceptor Residue</b> | <b>Acceptor Residue NO</b> | <b>Acceptor Atom</b> | <b>Occupancy%</b> |
|----------------------|-------------------------|-------------------|-------------------------|----------------------------|----------------------|-------------------|
| GLY                  | 1                       | N                 | PRO                     | 2                          | O                    | 51.10             |
| GLY                  | 4                       | N                 | PRO                     | 5                          | O                    | 89.14             |
| GLY                  | 4                       | N                 | PRO                     | 2                          | O                    | 88.16             |
| GLY                  | 4                       | N                 | PRO                     | 2                          | O                    | 84.80             |
| GLY                  | 7                       | N                 | PRO                     | 5                          | O                    | 90.76             |
| GLY                  | 7                       | N                 | PRO                     | 8                          | O                    | 90.53             |
| GLY                  | 7                       | N                 | PRO                     | 5                          | O                    | 90.27             |
| GLY                  | 10                      | N                 | PRO                     | 11                         | O                    | 91.20             |
| GLY                  | 10                      | N                 | PRO                     | 8                          | O                    | 90.80             |
| GLY                  | 10                      | N                 | PRO                     | 8                          | O                    | 89.86             |
| GLY                  | 13                      | N                 | PRO                     | 14                         | O                    | 90.86             |
| ALA                  | 13                      | N                 | PRO                     | 11                         | O                    | 90.00             |
| GLY                  | 13                      | N                 | PRO                     | 11                         | O                    | 89.95             |
| GLY                  | 16                      | N                 | PRO                     | 14                         | O                    | 91.03             |
| GLY                  | 16                      | N                 | PRO                     | 14                         | O                    | 90.48             |
| GLY                  | 16                      | N                 | PRO                     | 17                         | O                    | 89.91             |
| GLY                  | 19                      | N                 | PRO                     | 17                         | O                    | 90.90             |
| GLY                  | 19                      | N                 | PRO                     | 17                         | O                    | 90.46             |
| GLY                  | 19                      | N                 | PRO                     | 20                         | O                    | 90.23             |
| GLY                  | 22                      | N                 | PRO                     | 23                         | O                    | 90.63             |
| GLY                  | 22                      | N                 | PRO                     | 20                         | O                    | 90.21             |
| GLY                  | 22                      | N                 | PRO                     | 20                         | O                    | 89.88             |
| GLY                  | 25                      | N                 | PRO                     | 23                         | O                    | 90.13             |
| GLY                  | 25                      | N                 | PRO                     | 23                         | O                    | 89.65             |

**Table S7. MODEL-3 (TYPEIII) without\_ AuNS Conventional Hydrogen Bonds**

| <b>Donor Residue</b> | <b>Donor Residue NO</b> | <b>Donor Atom</b> | <b>Acceptor Residue</b> | <b>Acceptor Residue NO</b> | <b>Acceptor Atom</b> | <b>Occupancy%</b> |
|----------------------|-------------------------|-------------------|-------------------------|----------------------------|----------------------|-------------------|
| GLY                  | 1                       | N                 | PRO                     | 2                          | O                    | 71.45             |
| GLY                  | 4                       | N                 | ASP                     | 5                          | O                    | 98.98             |
| GLY                  | 4                       | N                 | PRO                     | 2                          | O                    | 98.36             |
| GLY                  | 4                       | N                 | PRO                     | 2                          | O                    | 97.03             |
| GLY                  | 7                       | N                 | ASP                     | 5                          | O                    | 99.36             |
| GLY                  | 7                       | N                 | ASP                     | 5                          | O                    | 99.32             |
| GLY                  | 7                       | N                 | GLU                     | 8                          | O                    | 98.90             |
| GLY                  | 10                      | N                 | GLU                     | 11                         | O                    | 99.27             |
| GLY                  | 10                      | N                 | GLU                     | 8                          | O                    | 98.96             |
| GLY                  | 10                      | N                 | GLU                     | 8                          | O                    | 98.45             |
| GLY                  | 13                      | N                 | GLU                     | 11                         | O                    | 99.11             |
| ALA                  | 13                      | N                 | GLU                     | 11                         | O                    | 99.07             |
| GLY                  | 13                      | N                 | ALA                     | 14                         | O                    | 98.23             |
| GLY                  | 16                      | N                 | ALA                     | 14                         | O                    | 95.66             |
| GLY                  | 16                      | N                 | ILE                     | 17                         | O                    | 95.52             |
| GLY                  | 16                      | N                 | ALA                     | 14                         | O                    | 95.20             |
| GLY                  | 19                      | N                 | HIE                     | 20                         | O                    | 98.02             |
| GLY                  | 19                      | N                 | ILE                     | 17                         | O                    | 97.86             |
| GLY                  | 19                      | N                 | ILE                     | 17                         | O                    | 97.34             |
| GLY                  | 22                      | N                 | HIE                     | 20                         | O                    | 98.31             |
| GLY                  | 22                      | N                 | PHE                     | 23                         | O                    | 94.61             |
| GLY                  | 22                      | N                 | HIE                     | 20                         | O                    | 94.37             |
| GLY                  | 25                      | N                 | PHE                     | 23                         | O                    | 95.41             |
| GLY                  | 25                      | N                 | PHE                     | 23                         | O                    | 93.40             |
| GLY                  | 25                      | N                 | PRO                     | 26                         | O                    | 88.06             |

**Table S8. MODEL-4 (TYPEI) without\_AuNS Conventional Hydrogen Bonds**

| Donor Residue | Donor Residue NO | Donor Atom | Acceptor Residue | Acceptor Residue NO | Acceptor Atom | Occupancy% |
|---------------|------------------|------------|------------------|---------------------|---------------|------------|
| GLY           | 757              | N          | GLU              | 755                 | O             | 79.95      |
| GLY           | 757              | N          | GLU              | 755                 | O             | 62.86      |
| GLY           | 757              | N          | SER              | 758                 | O             | 89.52      |
| GLY           | 760              | N          | PRO              | 758                 | O             | 93.14      |
| GLY           | 760              | N          | SER              | 758                 | O             | 90.65      |
| GLY           | 760              | N          | ALA              | 761                 | O             | 97.08      |
| GLY           | 763              | N          | ALA              | 761                 | O             | 96.38      |
| GLY           | 763              | N          | GLU              | 761                 | O             | 93.15      |
| GLY           | 763              | N          | PRO              | 764                 | O             | 95.88      |
| GLY           | 766              | N          | THR              | 764                 | O             | 95.48      |
| GLY           | 766              | N          | PRO              | 764                 | O             | 95.26      |
| GLY           | 766              | N          | ALA              | 767                 | O             | 96.90      |
| GLY           | 769              | N          | ALA              | 767                 | O             | 96.04      |
| GLY           | 769              | N          | PRO              | 767                 | O             | 94.40      |
| GLY           | 769              | N          | THR              | 770                 | O             | 95.67      |
| GLY           | 772              | N          | THR              | 770                 | O             | 95.95      |
| GLY           | 772              | N          | THR              | 770                 | O             | 95.33      |
| GLY           | 772              | N          | PRO              | 773                 | O             | 94.12      |
| GLY           | 775              | N          | PRO              | 773                 | O             | 97.85      |
| GLY           | 775              | N          | PRO              | 773                 | O             | 97.56      |
| GLY           | 775              | N          | ILE              | 776                 | O             | 98.01      |
| GLY           | 778              | N          | LEU              | 776                 | O             | 97.73      |
| GLY           | 778              | N          | ILE              | 776                 | O             | 96.94      |
| GLY           | 778              | N          | GLN              | 779                 | O             | 96.46      |

Conventional Hydrogen bonds for all the model systems are given in the Tables.

**Table S1. MODEL-1 (GPO\_AuNS) Table S2. MODEL-2 (GPP\_AuNS) Table S3. MODEL-3 (TYPEIII\_AuNS) Table S4. MODEL-4 (TYPEI\_AuNS) Table S5. MODEL-1 (without\_AuNS) Table S6. MODEL-2 (without\_AuNS) Table S7. MODEL-3 (without\_AuNS) Table S8. MODEL-4 (without\_AuNS)**
